# Supplementary material
Source: PubMed Central journal article supplement (PMC5474844)
Supplement: mmc2.pdf [file mmc2.pdf]

# Focal Adhesion Kinase: The Reversible Molecular Mechanosensor

Samuel Bell<sup>1</sup> and Eugene M. Terentjev<sup>1,\*</sup>

<sup>1</sup>Cavendish Laboratory, University of Cambridge, Cambridge, United Kingdom

**ABSTRACT** Sensors are the first element of the pathways that control the response of cells to their environment. Protein complexes that produce or enable a chemical signal in response to a mechanical stimulus are called “mechanosensors”. In this work, we develop a theoretical model describing the physical mechanism of a reversible single-molecule stiffness sensor. Although this has the potential for general application, here we apply the model to focal adhesion kinase, which initiates the chemical signal in its active phosphorylated conformation, but can spontaneously return to its closed folded conformation. We find how the rates of conformation changes depend on the substrate stiffness and the pulling force applied from the cell cytoskeleton. We find the sensor is homeostatic, spontaneously self-adjusting to reach a state where its range of maximum sensitivity matches the substrate stiffness. The results compare well with the phenotype observations of cells on different substrates.

## INTRODUCTION

Cells exist within a complex and varying environment. To function effectively, they must collect information about their surroundings, and then respond appropriately. Cell environment has a profound effect on cell migration, many aspects of metabolism, and the cell fate. It is also a major factor in metastasis of certain cancers (1,2). Sensing is the first part of the chain of events that constitute the cell response to external stimuli.

By definition, a sensor is a device that detects or measures a physical property (the signal or stimulus) and records, indicates, or otherwise responds to it by generating an output. Fig. 1 illustrates what a typical sensor output should be, in response to an appropriate signal. When the transition between off- and on-states is very sharp, this may be regarded as an on/off relay producing a digital all-or-nothing response. When this transition is diffuse, over a broad range of input, the sensor works in an analog manner providing a proportional response to the input signal in the range of its sensitivity. Outside of this range, the sensor is not responsive to changes in the input signal.

Cells respond to a variety of cues; both chemical and mechanical stimuli must be transduced inside the cell. Mechanosensors are protein complexes that produce responses to mechanical inputs (3,4). There are two distinct types of me-

chanosensing: reacting to an external force (we call this “mechanosensitivity of the first kind”), or sensing the viscoelastic properties of the cell environment (we call this “mechanosensitivity of the second kind”).

Mechanosensitive ion channels (MSC), such as alamethicin (5), are an example of mechanosensors of the first kind. MSCs exist in all cells and provide a nonspecific response to stress in a bilayer membrane (6,7). Traditionally, MSC operation is understood as a two-state model, as we will have in our model below, and has the response characterized in Fig. 1, where the input signal is membrane tension and the sensor output is the channel diameter. These two-state systems (open/closed, or bonded/released) with the energy barrier between the states depending on applied force are common in biophysics (8,9). Rates of transition in these systems are often calculated using the Bell formula (10), which has them increasing exponentially with the force. This is just the classical result of Kramers and Smoluchowski (11,12), but the application of this formula is problematic in the limit of small barriers.

A mechanosensor of the second kind has a different challenge: to actively measure the response coefficient (stiffness in this case, or matrix viscosity in the case of bacterial flagellar motion). On macroscopic scales (in engineering or rheometry) we can do this with two separate measurements: of force (stress) and of position (strain), or we could contrast two separate points of force application. One could also use inertial effects, such as impact or oscillation, to measure the stiffness or elastic constant of the element.

Submitted January 25, 2017, and accepted for publication April 28, 2017.

\*Correspondence: [emt1000@cam.ac.uk](mailto:emt1000@cam.ac.uk)

Editor: Alexander Dunn.

<http://dx.doi.org/10.1016/j.bpj.2017.04.048>

© 2017 Biophysical Society.

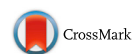

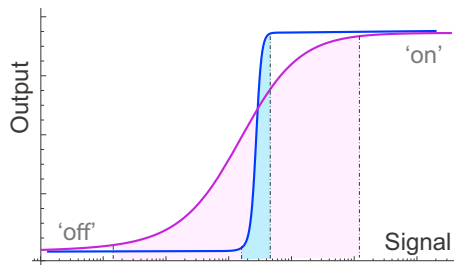

FIGURE 1 Given here is an illustration of sensor response to an input signal: the output is generated proportionally to the signal, and has a region of maximum sensitivity. This region can be narrow in a digital on-off relay, or continuously spread over a broad range of input values to generate an analog proportional output. To see this figure in color, go online.

None of these options are available on a molecular scale because of a very high resistance, and of a short-distance cutoff of elasticity. The single sensor complex cannot measure relative displacements in the substrate, and the overdamped dynamics prevents any role of inertia. Cells must come up with novel ways of measurement.

In an earlier study (13), this was examined by developing a physical mechanism with an action similar to the two-spring model of Erdmann and Schwarz (14) and Schwarz et al. (15). That work focused on the latent complex of  $TGF\beta$  (16–18), which is an irreversible one-off sensor: after the latent complex is broken and active  $TGF\beta$  released, the whole construct has to be replaced. Here we apply these ideas to a reversible mechanosensor: protein tyrosine-kinase, now called “focal adhesion kinase” (FAK) (19–22). As the name suggests, FAK is abundant in the regions of focal adhesions (20), which are developed in the cells on more stiff substrates, often also associated with fibrosis: the development of stress fibers of bundled actin filaments connecting to these focal adhesions and delivering a substantially higher pulling force. FAK is also present in cells on soft substrates despite the lack of any focal adhesions, and also in the lamellipodia during cell motility (21,23,24). Phosphorylation of tyrosine residues of FAK is well known as the initial step of at least two signaling pathways of mechanosensing (25), leading to the cell increasing production of smooth muscle actin, and eventually fibrosis, as well as producing and activating more myosin motors in the cytoskeleton.

### Mechanosensing at focal adhesions

To probe the mechanical modulus of a medium, a force has to be applied to it, either as a local point source, or as distributed stress. In focal adhesions, the source of this force is the actin-myosin activity of the cytoskeleton. Therefore, we need to trace the series of connected devices, from the point of force origin (F-actin) to the point of its application to the ECM. Fig. 2 illustrates this force chain, which has been reproduced in a large

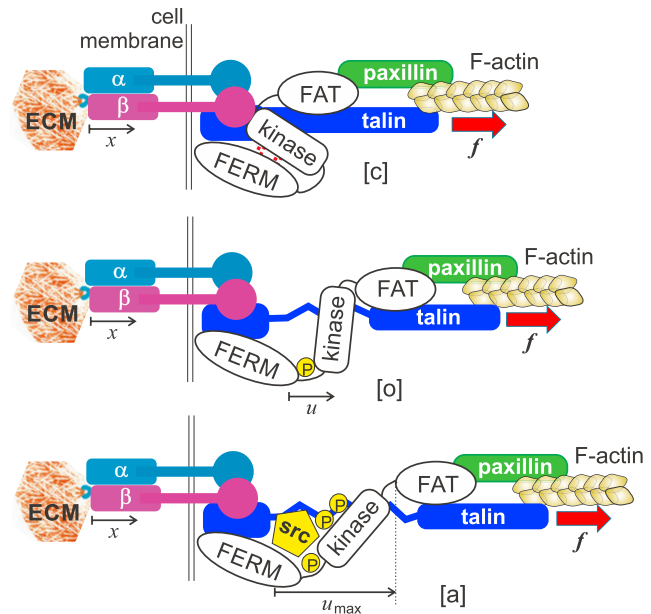

FIGURE 2 Given here is the assumed chain of force transduction from the F-actin of the cytoskeleton, through the activated  $\beta$ -integrin binding to ligands of the deformable ECM. The FERM domain of FAK is associated with the cell membrane, near the integrin-talin head assembly, whereas the FAT domain is associated with actin through its binding to paxillin (30). The pulling force is transmitted through this chain to the FERM-kinase physical bond. In the closed state [c] the kinase domain is inactive and the whole FAK protein is in its native low-energy state. Once the physical bond holding the FERM domain and the kinase together is broken, the protein adopts the open conformation [o]. In the open state, first the Tyr<sup>397</sup> site spontaneously phosphorylates, which in turn allows binding of Src and further phosphorylation of the kinase—turning it into the active state [a] (see (45,70,71)). To see this figure in color, go online.

number of important publications in this field (26–30). There are several key players that we should consider: integrins, focal adhesion kinase, talin, paxillin, and the cytoskeleton. How do these components each contribute to the function of the complex?

The integrin family of transmembrane proteins links the extracellular matrix (ECM) to the intracellular actin cytoskeleton via a variety of protein-tyrosine kinases, one of which is FAK (31). Integrins are aggregated in focal adhesions, and they mediate the cell interaction with ECM (3). Activation of integrins is required for adhesion to the substrate; active integrins acquire ligand affinity and bind to the proteins of the ECM. It is well established that integrin activation and clustering leads to FAK activation and the subsequent signaling chain of mechanosensing and cytoskeletal remodeling; e.g., see the review by Parsons (32). There is a large body of literature on integrins, with definitive reviews by Hynes (33,34) explicitly stating that integrins are the mechanosensors. It has recently been demonstrated (35,36) that the integrin bond with fibronectin has catch-bond characteristics, and therefore could have a graded response to force and stiffness.

However, activated integrins possess no further catalytic activity, and so cannot act as a mechanosensor on their own. A good summary by Giancotti (37), although talking about integrin signaling, in fact shows schemes where FAK is the nearest to cytoskeletal actin filaments. The important work by Guan et al. (38) and Guan and Shalloway (39) establishes a clear correlation chain of extracellular fibronectin-transmembrane integrins-intracellular FAK, but offers no reason to assume that integrin is the sensing device on this chain. There is a clear indication that phosphorylation of FAK is a key step in the mechanosensing process (4). Indeed, Schaller et al. (20) state that FAK phosphorylation is the initial step of signaling, and show evidence that cross-linking integrins and ECM (i.e., making the substrate stiffer) leads to an enhanced FAK phosphorylation, although, conversely, damage to integrin is connected with a reduced activation of FAK.

This lack of clarity on the link between integrin engagement and FAK activation during mechanosensing arises from the lack of detailed knowledge at a molecular/physical level of how FAK is activated. One possibility, explored by Erdmann and Schwarz (14) and Schwarz et al. (15), is that clusters of activated integrins always activate FAK and generate the mechanosensing signal that leads to the increasing F-actin pulling force. As some of the integrins are broken off from their ECM attachment, the associated FAK signal reduces, regulating the further force increase—and that is the action of the focal adhesion mechanosensor complex. More recently, these same ideas have incorporated newly discovered catch-bond characteristics of the integrin-ECM links (35). In both cases, the mechanosensing response is an emergent property—you need a collection of coupled mechanosensors of the first kind to generate a stiffness sensing response. We think this work is elegant, and important, but ask the question: are there any other possible mechanisms?

The application of tension in mechanosensing at focal adhesions is now well established (30). A key role in this system is played by talin. There are many articles investigating the correlation of talin (as well as paxillin) with  $\beta$ -integrin and FAK; recent studies clearly show that talin is capable of high stretching by a tensile force (40,41), implying a function similar to that of titin in muscle cells: acting as an extension-limiter. It is also now clear that the immobile domain at the N-terminal of talin is associated with integrin, and also closely associated with the FERM domain of FAK (40,41), whereas the C-terminal of talin is associated with paxillin, which in turn may associate (perhaps via vinculin) with the focal adhesion targeting (FAT) domain (C-terminal) of FAK. Both talin and paxillin also bind to cytoskeletal F-actin. These actin filaments exert a pulling force on the C-terminal of talin, making it play a role of a scaffold for other proteins to arrange around. More importantly, this allows the pulling force to be transmitted from the cytoskeleton to the ECM, via the

force chain sketched in Fig. 2. This could be used to effect the conformational change in FAK required for its activation. In this model, integrin is merely the bridging element from FAK to the ECM, with the FERM domain localized near the cell membrane and N-terminal of talin. At the opposite end, the FAT domain can be pulled away by the cytoskeletal force transmitted through paxillin/talin. This model is supported by the recent computational analysis (42) showing that the closed and the open states of FAK are reversibly reached by increasing and decreasing of pulling force.

Here, using this idea of FAK conformational change under applied force, we demonstrate that sensing of stiffness may be a distinct single-molecule response, and develop a theoretical model of reversible mechanosensor of the second kind. The underlying physics of our model is applicable to a wide variety of protein complexes, but here we concentrate on the focal adhesion kinase, because FAK occupies a central point in mechanosensing pathways of focal adhesions (25). We posit that the activation of FAK is dependent on cytoskeletal tension and ECM stiffness, and the integrin (along with other members of the force chain in Fig. 2) is playing a role of force transducer. Of course, without the activated integrin there would be no force transduction to ECM, and no mechanosensing. We do not consider the role of clustering. This is clearly an area of further work in this field, because clustering is definitely an important aspect of the process on stiff substrates: allostery of integrins (and associated FAK) must have a role in the signaling process, as it has in chemotaxis (43,44). This article focuses on the physical model of an individual FAK sensor operation.

## MATERIALS AND METHODS

Our work relies on identifying the conformational transitions associated with FAK's activation, and how the effective free energy of such a protein must evolve on conformational change. From this information, we can construct the physical model that includes the viscoelastic response of the ECM and the thermally activated response of the protein mechanosensor. It turns out that thermal activation (thermal noise) and the associated viscous damping are essential in both elements of the mechanical chain. We then derive the effective rate of FAK opening and activation (as well as the reverse rate of its autoinhibition) using the methods of stochastic Kramers theory.

### Structural model

There are three key conformational states, illustrated in Fig. 2. In the native folded state of FAK, the FERM domain (the N-terminal of the protein) is physically bonded to the catalytic domain (kinase) (22,45) via a number of weak interactions, such as hydrophobic, van der Waals, and hydrogen bonds; we call this the closed state, [c]. A conformational change occurs, which we shall call a transition to an open state, [o], when this physical bond is disrupted and the kinase separates from the FERM domain. Note that because there is a peptide chain link ([362–411] segment) between the FERM and kinase domains, they remain closely associated even after the conformational change—this is what makes FAK a reversible mechanosensor. The activation of the catalytic domain occurs in two steps: first

the Tyr<sup>397</sup> residue is phosphorylated, which then allows binding of the Src kinase (46), which in turn promotes phosphorylation of several other sites of the catalytic domain (Tyr<sup>407</sup>, Tyr<sup>576</sup>, Tyr<sup>577</sup>, Tyr<sup>861</sup>, and Tyr<sup>925</sup>), making FAK fully activated. There is also a process involving p130cas, acting as a kinase substrate, involved in generating the response of activated FAK (47,48). We identify this state as active, [a], in the subsequent discussion.

Because we shall not consider the cell motility in this article, one has to assume that the FERM domain remains fixed with respect to the ECM/integrin reference frame. That is, if there is a deformation in (soft) ECM, then this point will move accordingly, with the integrin and the local cell membrane all joined together. In our model, to achieve the large displacement associated with the [c] → [o] conformational transition of FAK, in the crowded intracellular environment, a mechanical work is expended. This mechanical energy can only come from the active cytoskeletal forces, delivered via actin filaments.

We can now record these conformational changes in the FAK structure in the schematic plot of the unfolding free energy, which will play the role of potential energy  $U(u)$  for the subsequent stochastic analysis of the sensor action. This free energy is illustrated in Fig. 3 *a* in the absence of pulling force. The concept of such unfolding free energy is becoming quite common (49). One identifies an appropriate reaction coordinate and discovers that a deep free energy minimum exists in the native folded state, which is our state [c]. Outside of this global free energy minimum, there is a broad range of intermediate conformations having a ragged, but essentially flat, free energy profile, forming what is commonly known as a funnel for the protein folding/unfolding. In our context, this range represents the open state [o], and the protein will rapidly fold back into its native state [c], un-

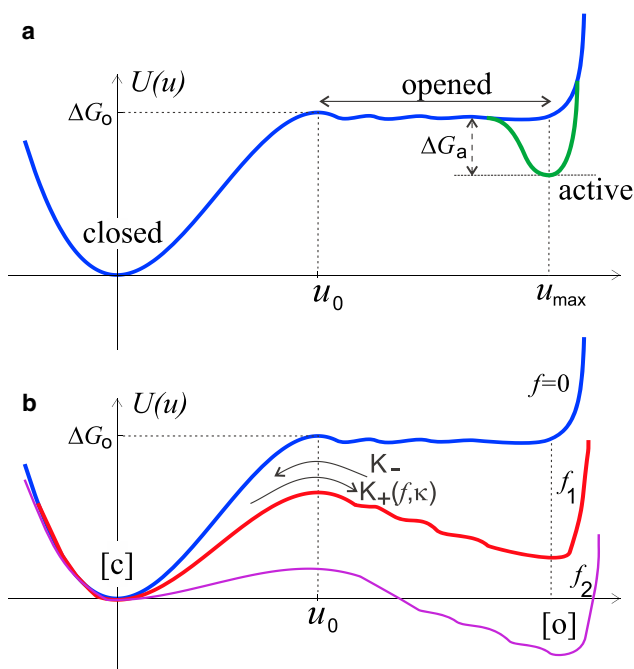

**FIGURE 3** Shown here is a schematic of potential energy of different FAK conformations. (*a*) The force-free molecule has its native folded state [c] (compare with Fig. 2). The binding free energy  $\Delta G_o$  has to be overcome to separate the kinase from the FERM domain, after which there is a range of conformations of where roughly the same energy is achieved by further separating these two domains in the open state [o]. At full separation (distance  $u_{\max}$ ) the Src binding and kinase phosphorylation lead to the active state [a] of the protein, with the free energy gain  $\Delta G_a$ . (*b*) When a pulling force is applied to this system ( $f_2 > f_1 > 0$ ), the potential energy profile distorts, so that both [o] and [a] states shift down in energy by the same amount of  $-f \times u_{\max}$ . To see this figure in color, go online.

less this refolding is inhibited by, e.g., changing pH, temperature, or in our case—transition to the active state [a]. The subsequent unfolding of protein domains into a random coil of its secondary structure would cause a significant raise of the free energy.

Fig. 3 *a* needs to be looked at together with the conformation sketches in Fig. 2: the native state [c] needs a substantial free energy ( $\Delta G_o$ ) to disrupt the physical bonds holding the kinase and FERM domains together. However, once this is achieved, there are only very minor free energy changes due to the small bending of the [362–411] segment (22), when the kinase and FERM domains are gradually pulled apart. This change is measured by the relative distance, which we label  $u$  in the sketch and in the plot. If one insists on further separation of the protein ends, past the fully open conformation [o] at  $u = u_{\max}$ , the protein will have to further unfold at a great cost to the free energy. Binding of Src and phosphorylation (i.e., converting the [o] state into the [a] state) lowers the free energy of the fully open conformation by an amount  $\Delta G_a$ . Note that there is no path back to the closed state, once the kinase is activated: one can only achieve autoinhibition (22) via the [a] → [o] → [c] sequence.

If we accept the basic form of the protein potential profile, as shown in Fig. 3 *a*, the effect of the pulling force  $f$  applied to FAK from the actin cytoskeletal filaments is accounted for by the mechanical work  $-(f \times u)$  added to the original protein free energy. If we take the reference point  $u = 0$  as the closed native conformation [c], then under an external pulling force the opening barrier reduces by  $\Delta G_o - f \times u_0$ . Similarly, the free energy of the fully open state [o] becomes lower by  $\Delta G_o - f \times u_{\max}$  (see Fig. 3 *b*). This develops the second free energy minimum, and makes the [o] state increasingly more stable. We assume the binding of Src and phosphorylation are not parts of the force chain (ECM-integrin-FAK-cytoskeleton) and so do not depend on the applied force. Therefore the energy level of the active state [a] lowers by the same amount of  $\Delta G_a$  relative to this [o] state.

### Stochastic two-spring model

The two-spring model discussed in detail by Erdmann and Schwarz (14) and Schwarz et al. (15) and often reproduced afterwards (25) is a correct concept, except that it needs to take into account that both the viscoelastic substrate and the sensor, described by the effective potential energy  $U(u)$ , experience independent thermal excitations. This is inevitable at the molecular level, because we are considering the mechanical damping in the substrate (as we must) and in the sensor (as we will). In the overdamped limit, all forces must balance along the series of connected elements, so the system is always in mechanical equilibrium. Here it is important to distinguish between mechanical equilibrium and chemical equilibrium. The former sets up the free energy profile, which then determines the latter. The mechanical stimulus does not drive the system. Instead, as in the classical rate theory, it is thermal fluctuations that allow the system to evolve. In our case, thermal fluctuations (which are independent in the two elements) can create a relative displacement in the middle of this series (i.e., on the sensor). It is this relative displacement that one needs to measure the stiffness.

Following the logic outlined in greater detail in earlier work (13), we introduce two independent stochastic variables. The first is  $x_1 = x$ , which measures the displacement of the substrate with respect to its undeformed reference state, and therefore also marks the position of the FERM domain (or the origin of the length  $u$ ). The second is  $x_2$ , which measures the displacement of the far end of the kinase domain: the point of application of the pulling force  $f$  (see Fig. 4 for an illustration). The approach to chemical equilibrium, in these variables, is described as follows by a pair of coupled overdamped Langevin equations:

$$\begin{aligned} \gamma_{\text{sub}} \dot{x}_1 &= -\kappa x_1 + \frac{dU}{d(x_2 - x_1)} + \sqrt{2k_B T} \gamma_{\text{sub}} \zeta_1(t), \\ \gamma_{\text{FAK}} \dot{x}_2 &= -\frac{dU}{d(x_2 - x_1)} + f + \sqrt{2k_B T} \gamma_{\text{FAK}} \zeta_2(t), \end{aligned} \quad (1)$$

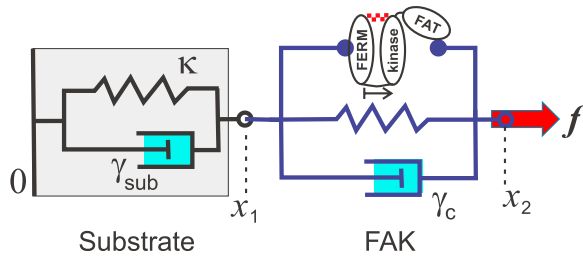

FIGURE 4 Here is a scheme of the two-spring model used to produce Eq. 1. The viscoelastic substrate is characterized by its elastic stiffness and stress-relaxation time given by  $\gamma_{\text{sub}}/\kappa$ . The conformational change of FAK is described by a potential  $U(u)$  (see Fig. 3), and the associated relaxation time determined by the damping constant  $\gamma_{\text{FAK}}$ . To see this figure in color, go online.

where  $\kappa$  is the elastic stiffness,  $\gamma_{\text{sub}}$  is the damping constant of viscoelastic substrate (ECM), and  $\gamma_{\text{FAK}}$  is the (completely independent) damping constant for the conformational changes in FAK structure. The base stochastic processes  $\zeta_{1,2}(t)$  are assumed to be Gaussian and normalized to unity, whereas the fluctuation-dissipation theorem determines the magnitude of thermal force in each equation. Note that it is the difference in independent position coordinates  $u = x_2 - x_1$ , which affects the sensor potential  $U(u)$  plotted in Fig. 3. The problem naturally reduces to a two-dimensional Smoluchowski equation for the variables  $x(t) = x_1$  for the substrate, and  $u(t)$  for the FAK conformations, with the corresponding diffusion constants  $D_i = k_B T / \gamma_i$ , and the Cartesian components of diffusion current, as follows:

$$J_i = -\frac{k_B T}{\gamma_i} e^{-V_{\text{eff}}/k_B T} \nabla_i (e^{V_{\text{eff}}/k_B T} P), \quad (2)$$

where  $j = 1, 2$ ,  $P(x_1, x_2; t)$  is the probability distribution of the process, and the following expression:

$$\begin{aligned} V_{\text{eff}}(x_1, x_2) &= \frac{1}{2} \kappa x_1^2 - f x_2 + U(x_2 - x_1) \\ &= \frac{1}{2} \kappa x^2 - f x + U(u) - f u \end{aligned} \quad (3)$$

represents the effective potential landscape over which the substrate and the mechanosensor complex move, subject to thermal excitation and the external constant force  $f$ . This landscape is illustrated in Fig. 5.

The effective Kramers problem of escape over the barrier has been solved many times over the years (8,11,12,50,51). The multidimensional Kramers

escape problem, with the potential profile not dissimilar to that in Fig. 5, was also solved many times (52,53). Unlike many previous approaches, we will not allow unphysical solutions by mistreating the case of very low/vanishing barrier. In the case when the effective potential barrier is not high enough to permit the classical Kramers approach of steepest descent integrals, one of several good general methods is via Laplace transformation of the Smoluchowski equation (12,54). The compact answer for the mean time of first passage from the closed state [c] to the top of the barrier of height  $Q$  a distance  $\Delta u$  away is as follows:

$$\tau_+ = \frac{\Delta u^2}{D} \left[ \left( \frac{k_B T}{Q} \right)^2 (e^{Q/k_B T} - 1) - \frac{k_B T}{Q} \right]. \quad (4)$$

This is a key expression, which gives the standard Kramers thermal-activation law when the barrier is high (which is also the regime when the Bell formula (10) is valid), but in the limit of the low barrier, it correctly reduces to the simple diffusion time across the distance  $\Delta u$ .

## Estimates of material parameters

We shall find that our model predictions are very sensitive to values of several key parameters, so a careful discussion of their estimates is required.

We start with the strength of the bond holding the FERM and kinase domain in the closed (inhibited) state, labeled as  $\Delta G_o$  in Fig. 3. The MD simulation study (42) estimated the energy barrier for FAK opening as  $\Delta G_o \approx 28.5 k_B T$ , which is 17 kcal/mol at room temperature. This value seems too high, and Zhou et al. (42) also comment on that. It is known that interdomain hydrophobic interaction in such proteins is usually low affinity. For instance, a measurement in a different multidomain protein gives a value for this bonding energy as 7 kcal/mol, or  $\sim 11 k_B T$  (55). However, this is close to an energy of just 1–2 hydrophobic contacts, and there is more affinity between FERM and kinase domains observed in Zhou et al. (42). In the end, we select an intermediate value between the two limits mentioned above:  $\Delta G_o \approx 17 k_B T$ , or 10 kcal/mol, and illustrate how alternative values (stronger and weaker interdomain bond) change our predictions in the Supporting Material.

We take the position of the barrier from the computational study:  $u_0 = 0.9 \text{ nm}$  (42), which is a reasonable value for the protein domain structure. This determines the value of critical force at which the native minimum disappears, and the closed state [c] becomes completely unstable,  $f_c = 3\Delta G_o / 2u_0 \approx 110 \text{ pN}$ . This is a very high force that is likely to unfold most proteins, and is also unlikely to be generated by a single actin filament of a cell cytoskeleton. For comparison, studies investigating the force required to disrupt the fibronectin-integrin-cytoskeleton linkage, report the value of only 1–2 pN (56,57); this is probably too low (an underestimate), because a single myosin motor exerts  $\sim 3 \text{ pN}$  of force (58,59). So we should explore the effect of pulling forces in the range of single to tens of pN.

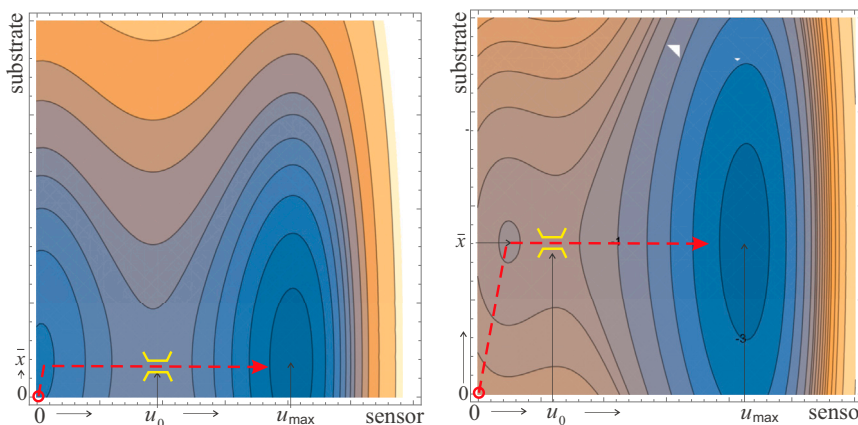

FIGURE 5 Given here is the two-dimensional contour plot of the effective potential  $V_{\text{eff}}(x, u)$  at low pulling force (left) and at high pulling force (right). The position of substrate anchoring has moved from  $x = 0$  to  $\bar{x} = f/\kappa$ , and the depth of the energy well of the [c] state has lowered to  $\Delta G_o - fu_{\text{max}}$ . The dashed line shows the path of the system evolution that leads to crossing the barrier toward the open state. To see this figure in color, go online.

We now look at substrate stiffness. For reference, the elastic modulus of a typical collagen-rich mammalian tendon is 1.2 GPa (60), of a collagen/elastin ligament is 1.1 MPa (61), and of an aorta wall is 0.8 MPa (62). Synthetic rubber has a modulus at  $\sim 100$  kPa (63). Epithelial and glial tissues have a much lower modulus of 100–1 kPa (64,65); see [Supporting Material](#) for an illustration of viscoelastic response of several other soft materials. If a half-space occupied by an elastic medium (e.g., gel substrate or glass plate) with the Young's modulus  $Y$ , and a point force  $f$ , is applied along the surface (modeling the pulling of the integrin-ECM junction; see [Fig. 2](#)), the response coefficient (spring constant) that we have called the "stiffness" is given by  $\kappa = (4/3)\pi Y \xi$ , where  $\xi$  is a short-distance elastic cut-off: a length scale analogous to the mesh size of a densely packed (nonfilamentous) substrate. This is a classical relation going as far back as Lord Kelvin (66). In the work of Yeung et al. (67) on comparative cell response on soft substrates, the weakest meaningful substrate had  $Y = 540$  Pa. For a more typical weak gel with  $Y = 10$  kPa, and a characteristic network mesh size  $\xi = 10$  nm, we obtain  $\kappa = 4.2 \times 10^{-4}$  N/m. On a stiff mineral glass with  $Y = 10$  GPa, we must take the characteristic size to be a cage size (slightly above the size of a monomer),  $\xi = 1$  nm, which gives  $\kappa = 42$  N/m. A typical stiff plastic has a value  $\sim 10$  times smaller. So a large spectrum of stiffnesses  $\kappa$  could be explored by living cells.

Finally, we need estimates of the damping constants. The simulation study (42) determined a very reasonable value for the internal diffusion constant of the FAK complex of  $D = k_B T / \gamma_{\text{FAK}} \approx 6 \times 10^{-12}$  m<sup>2</sup> s<sup>-1</sup>. At room temperature, this gives the damping constant as  $\gamma_{\text{FAK}} = 7 \times 10^{-10}$  kg s<sup>-1</sup>. Then, the overall scale (i.e., the bare magnitude) of the FAK opening rate  $K_+$  derived below, [Eq. 8](#), is  $(\Delta G_o / u_0^2 \gamma_{\text{FAK}}) \approx 8 \times 10^7$  s<sup>-1</sup>, which means a timescale of  $\sim 12$  ns. This bare timescale is compatible with available data and simulations on full and partial protein unfolding (68); naturally, at given bonding energy and low pulling force, the actual rate of FAK opening/activation would be much lower: the plots below suggest tens of microseconds to milliseconds range.

To estimate the damping constant of the viscoelastic substrate, we need the characteristic time of its internal relaxation, which is the ratio  $\gamma_{\text{sub}}/\kappa$  in our notation. There is an extended discussion of this issue (of substrate viscoelasticity and how to interpret it in our context) in the [Supporting Material](#). It is important to note here that the local time of relaxation of thermal fluctuations must not be confused with the macroscopic stress relaxation time, which can sometimes be very long in rubbers and gels. To our surprise, we note that this fluctuation relaxation time,  $\tau_{\text{sub}} \gg 0.01$  s, appears relatively universal across substrate stiffnesses. Therefore, we take  $\gamma_{\text{sub}} = \tau_{\text{sub}}\kappa$ . As such, the ratio between the damping coefficients,  $\gamma_{\text{FAK}} = \gamma_{\text{sub}}$ , takes a wide range of values, from  $10^{-6}$  for soft substrates, to 0.1 for stiffer substrates.

## RESULTS AND DISCUSSION

We now apply the generic expression for the mean first passage time in [Eq. 4](#) to  $V_{\text{eff}}(x_1, x_2)$  to find the rates of  $[c] \rightarrow [o]$  conformational change. We can plot these rates, and test their predictions against what is observed in this biological system.

### Rate of $[c] \rightarrow [o]$ transition: $K^+$

There are many complexities regarding choosing an optimal path across the potential landscape  $V_{\text{eff}}(x, u)$ , some of which are discussed in Langer (52) and Suzuki and Dudko (53), but we are aiming for the quickest way to a qualitatively meaningful answer. As such, we shall assume that the reaction path consists of two legs: from the origin down to the minimum of the potential, which is shifted to  $\bar{x} = f/\kappa$  due to the substrate deformation, and then from this minimum straight

over the saddle (barrier) into the open state of FAK conformation. The average time along the first leg is given by the [Eq. 4](#) with the distance  $\Delta u = \bar{x}$  and the negative elastic energy in this minimum,  $E = -f^2/2\kappa$ , with the diffusion constant determined as follows by the damping constant of the substrate:

$$\tau_{\text{drift}} = \frac{2\gamma_{\text{sub}}}{\kappa} + \frac{4\gamma_{\text{sub}}k_B T}{f^2} \left( e^{-f^2/2\kappa k_B T} - 1 \right). \quad (5)$$

Here the ratio  $\gamma_{\text{sub}}/\kappa$  is the characteristic time of fluctuation relaxation in the viscoelastic substrate (69), which will play a significant role in our results. Naturally,  $\tau_{\text{drift}} = 0$  when there is no pulling force and the effective potential minimum is at  $(x = 0, u = 0)$ .

In the region between the minimum of  $V_{\text{eff}}$  and the potential barrier, a number of earlier articles (13,51,53) have used the effective cubic potential to model this portion of  $U(u)$ . In this case, when the pulling force is applied, the barrier height is reducing, as  $E = \Delta G_o(1 - 2fu_0/3\Delta G_o)^{3/2}$ . The distance between the minimum  $[c]$  and the maximum at the top of the barrier is reducing as well, at  $\Delta u = u_0(1 - 2fu_0/3\Delta G_o)^{1/2}$ . Substituting these values into [Eq. 4](#), we find the mean passage time over the barrier as follows:

$$\begin{aligned} \tau_{\text{open}} = & - \frac{\gamma_{\text{FAK}} u_0^2}{\Delta G_o \left( 1 - \frac{2fu_0}{3\Delta G_o} \right)^{1/2}} \\ & + \frac{\gamma_{\text{FAK}} k_B T u_0^2}{\Delta G_o^2 \left( 1 - \frac{2fu_0}{3\Delta G_o} \right)^2} \left( e^{\frac{\Delta G_o \left( 1 - \frac{2fu_0}{3\Delta G_o} \right)^{3/2}}{k_B T}} - 1 \right). \end{aligned} \quad (6)$$

In the limit of high barrier  $\Delta G_o \gg k_B T$ , and small pulling force, this expression becomes proportional to  $e^{-(\Delta G_o - fu_0)/k_B T}$ , i.e., it recovers the Bell formula that people use widely. When the force increases toward the limit  $f_c = 3\Delta G_o/2u_0$ , this time  $\tau_{\text{open}}$  reduces dramatically: there is no barrier left to overcome, and the minimum of  $V_{\text{eff}}$  shifts to coincide with the entrance to the  $[o]$  state.

The overall rate constant of the  $[c] \rightarrow [o]$  transition,  $K_+$ , is then determined as the inverse of the total time, as follows:

$$K_+ = \frac{1}{\tau_{\text{drift}} + \tau_{\text{open}}}. \quad (7)$$

From examining [Eqs. 5](#) and [6](#) it is evident that the rate of FAK opening is a strong function of the pulling force  $f$ , but more importantly: it changes dramatically with the substrate stiffness  $\kappa$ . The important exponential factor  $e^{f^2/2\kappa k_B T}$  appears in  $\tau_{\text{drift}}$ ; it was discussed at length in Escudé et al. (13), where it has emerged in a very different approach to solving a similar problem, and interpreted as an effective

enzyme effect of the system being confined at the bottom of the potential well before jumping over the barrier.

We can scale the rate constant  $K_+$  to convert it into nondimensional values. First, we can identify a characteristic timescale of the FAK conformational change:  $u_0^2 \gamma_{\text{FAK}} / \Delta G_o$ . The two control parameters defining the opening rate  $K_+$  are also made nondimensional by scaling the force by the natural value of the FERM-kinase holding potential,  $\Delta G_o / u_0$ , and scaling the substrate stiffness by  $\Delta G_o / u_0^2$ . After these transformations, and some algebra, we obtain the following:

$$K_+ = \left( \frac{\Delta G_o}{u_0^2 \gamma_{\text{FAK}}} \right) \frac{g \bar{f}^2 (1 - 2\bar{f}/3)^2 \zeta}{4(1 - 2\bar{f}/3)^2 \Psi_1[\bar{f}] + \bar{f}^2 \zeta \Psi_2[\bar{f}]}, \quad (8)$$

with shorthand notations as follows:

$$\Psi_1[\bar{f}] = \exp\left[-g \bar{f}^2 / 2\bar{\kappa}\right] + g \bar{f}^2 / 2\bar{\kappa} - 1,$$

$$\Psi_2[\bar{f}] = \exp\left[g(1 - 2\bar{f}/3)^{3/2}\right] - g(1 - 2\bar{f}/3)^{3/2} - 1,$$

where the nondimensional abbreviations stand for the energy barrier  $g = \Delta G_o / k_B T$ , the force  $\bar{f} = f \times u_0 / \Delta G_o$ , the substrate stiffness  $\bar{\kappa} = \kappa \times u_0^2 / \Delta G_o$ , and the ratio of damping constants  $\zeta = \gamma_{\text{FAK}} / \gamma_{\text{sub}}$ . There are several key effects predicted by this expression, which we can examine by plotting it.

Fig. 6 presents the rate of FAK opening for several values of pulling force, as a function of substrate stiffness. The rate of FAK activation has a characteristic (generic) form of any sensor (as in Fig. 1) in that it undergoes a continuous change between the off- and on-states. The latter is a state of high rate of FAK opening and the subsequent phosphorylation that occurs on stiffer substrates. The force applied to the complex determines its response for a given substrate: the substrate could be too soft, meaning that FAK does not activate

at all—and also too stiff, where the rate of activation reaches a plateau and no longer responds to further stiffening. Between these two limits, there is a range of maximum sensitivity where the rate of activation directly reflects the change of substrate stiffness. Note that due to the logarithmic scale, this range is actually as much as one order of magnitude in stiffness—quite broad, and we suspect more than enough to precisely sense local variations in stiffness. Fig. 6 *b* highlights this by presenting the sensitivity directly as the value of the derivative  $dK_+/d\kappa$ . We see that cells with a higher pulling force (i.e., with high actin-myosin activity and more developed stress fibers) are sensitive to the substrates in the more stiff range. In contrast, cells that exert a low pulling force (i.e., no stress fibers, lower actin-myosin activity) are mostly sensitive to soft substrates. This is in good agreement with broad observations about the cell mechanosensitivity of the second kind, and their response to substrate stiffness.

The dependence of the sensor on the force applied by the cytoskeleton is illustrated in Fig. 7. We see a rapid increase in the rate that FAK opens (and its subsequent phosphorylation) on stiffer substrates. For the complex to actively probe the substrate stiffness (mechanosensitivity of the second kind), we posit that the cell remodels itself in response to FAK activation, increasing the pulling force. This further increases the level of FAK activation in a positive feedback manner, until a maximum rate is reached. Any increase in force beyond this point decreases the rate of FAK opening. This would act as a mechanism for negative feedback, which settles the cell tension in homeostasis at the peak of the corresponding curves in Fig. 7. The stiffer the substrate, the higher the rate of FAK activation and, accordingly, the more  $\alpha$ -SMA stress fibers one would find in this adjusted cell (leading to morphological changes such as fibroblast-myofibroblast transition, or the fibrosis of smooth muscle cells). On soft substrates with sufficiently small Young's modulus there is no positive force that gives a maximum

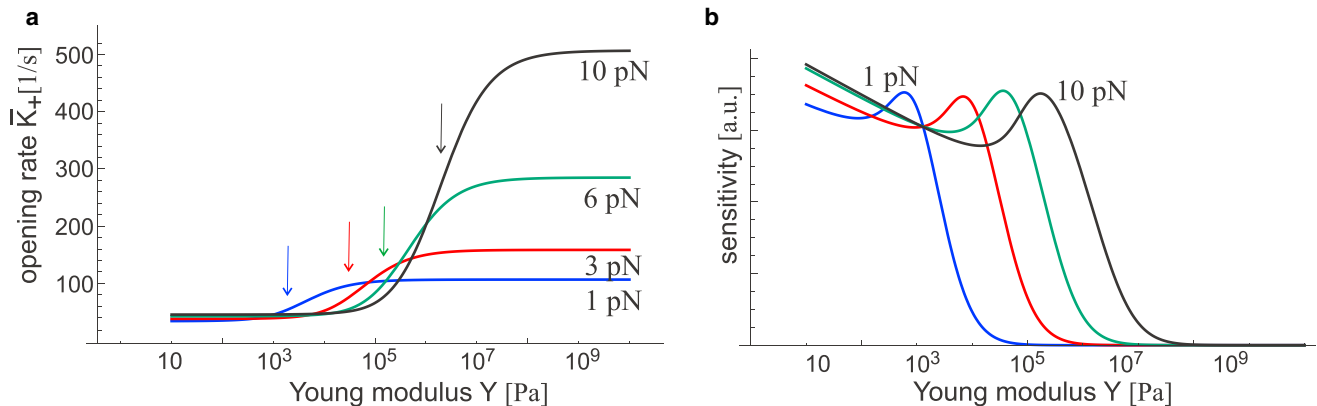

FIGURE 6 (a) The rate constant of the  $[c] \rightarrow [o]$  transition  $K_+(f, \kappa)$  is plotted against the substrate stiffness (on logarithmic scale) for several values of pulling force  $f$ . The arrows point at the inflection point on each curve, i.e., the region of maximum sensitivity. (b) Given here is the plot of sensitivity  $dK_+/dY$  for the same parameters, illustrating the maximum sensitivity range at each level of pulling force. To see this figure in color, go online.

in the opening rate. Thus, any pulling force on the FAK-integrin-ECM chain has the effect of further lowering the activation of FAK relative to the tension-free state, and so the cell does not develop any additional tension in the cytoskeleton. This is consistent with the observation that cells do not develop focal adhesions on soft gels.

### Stress relaxation in substrate regulates $K_+$

There are many indications in the literature that not only the substrate stiffness, but also the degree of viscoelasticity (often measured by the characteristic time of stress relaxation), have an effect on cell mechanosensitivity (69). It is certainly impossible to have a universal model covering the highly diverse viscoelasticity of gels, filament networks, and disordered solids like plastic and glass. In the spirit of our ultimately simplified viscoelastic model expressed in Eq. 1, the single parameter characterizing viscoelasticity could be the characteristic timescale  $\tau_{\text{sub}} = \gamma_{\text{sub}}/\kappa$ : this could be a measure of the actual stress relaxation time of different substrates. Although we have taken  $\tau_{\text{sub}} = 0.01$  s up to this point, we now vary this timescale.

We assume that the damping constant  $\gamma_{\text{FAK}}$  of the FAK complex remains the same. In that case, Fig. 8 shows how changing the damping constant of the substrate  $\tau_{\text{sub}}$  can regulate the FAK mechanosensor. All curves retain the same topology, but the amplitude varies, and the range of sensitivity shifts in proportion to  $\tau_{\text{sub}}$ . The green curve for  $\tau_{\text{sub}} = 0.01$  s is the same as the green curve for  $f = 6$  pN in both plots in Fig. 6. We find that for substrates with larger relaxation times, i.e., with a greater role of viscous dissipation, the FAK sensor will activate at higher stiffnesses. In other words, stress relaxation suppresses the response of a

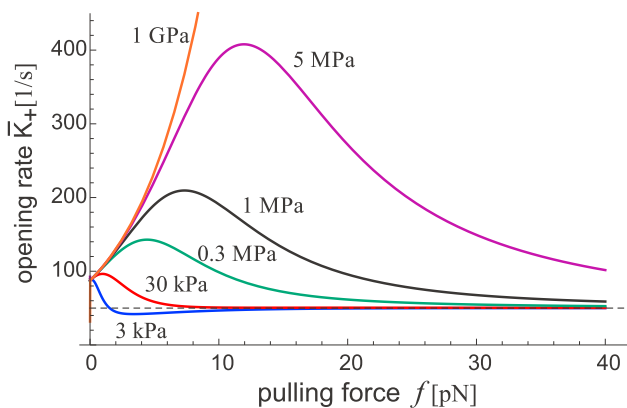

FIGURE 7 The rate constant of FAK opening  $K_+(f, \kappa)$  is plotted as a function of the cytoskeletal pulling force  $f$ , for several values of substrate stiffness labeled on the plot. The dashed line marks the rate  $K_{\text{sub}} = 1/2\tau_{\text{sub}}$  for the opening without any barrier. The homeostatic peaks of activation rate  $K_+(f)$ , for each given substrate stiffness, roughly correspond to the peak of sensitivity in Fig. 6 b at the same level of force. This suggests that the cell self-adjusts the sensor to keep it at the optimal sensitivity on each substrate. To see this figure in color, go online.

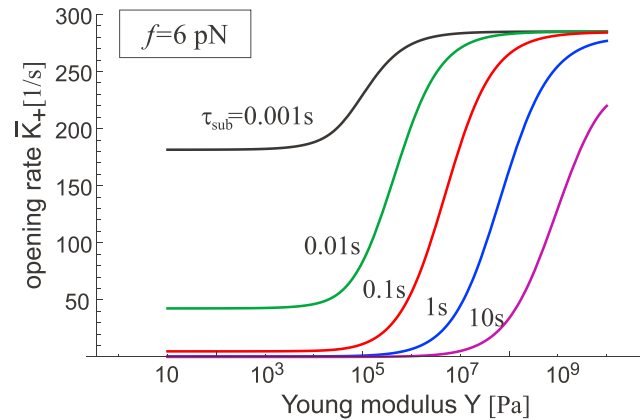

FIGURE 8 The rate of the  $[c] \rightarrow [o]$  transition  $K_+(f, \kappa)$  is plotted against the substrate stiffness for a fixed (low) value of pulling force and a set of changing stress-relaxation properties of the substrate measured by the internal relaxation time  $\tau_{\text{sub}}$  (see Eqs. 1 and 8). The range of maximum sensitivity shifts to the effectively stiffer substrate range for materials with longer internal relaxation; in contrast, a purely elastic material with  $\tau_{\text{sub}} \rightarrow 0$  has very little effect on the mechanosensor. To see this figure in color, go online.

sensor with respect to a strictly elastic substrate. It is also important to note that the difference in activation rate between the off- and on-states increases with increasing stress relaxation time. If we were to send  $\tau_{\text{sub}} \rightarrow 0$ , i.e., place the cell on an ideal purely elastic material, then we would see no sensing response at all. So, the viscoelastic nature of the substrate is important for the sensing behavior of the complex.

The strong effect of substrate viscoelasticity on the absolute value of rate of FAK activation  $K_+$  is shown in Fig. 9, for an example of a typical rubber with the Young's modulus of  $\sim 300$  MPa. A range of  $\tau_{\text{sub}}$  is tested, and here we again see how the material with a longer relaxation time has a reduced response at any pulling force. This is essentially analogous to the substrate appearing softer.

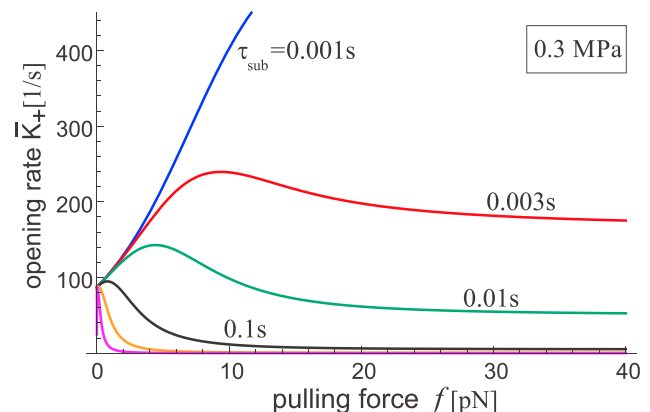

FIGURE 9 The rate of the  $[c] \rightarrow [o]$  transition  $K_+(f, \kappa)$  is plotted against the pulling force  $f$  (in the biologically relevant range of small forces) for a set of values  $\tau_{\text{sub}}$  labeled on the plot representing the change in stress-relaxation characteristics of the substrate (the last two curves are for  $\tau_{\text{sub}} = 1$  and 10 s, respectively). To see this figure in color, go online.



### Rate of [o] → [c] autoinhibition: $K_-$

The free energy profile of the conformation change leading to the [o] → [c] transition (i.e., the spontaneous return of FAK to its native folded conformation, i.e., the autoinhibition) is essentially described by a linear potential (see Fig. 3). From the reference point of [o] state, the energy barrier is  $E = f(u_{\max} - u_0)$ , and we should assume that the physical distance the FERM domain needs to travel remains constant: it is determined by the extent of the protein structure (22,70). This process also does not depend on the substrate stiffness. As a result, the rate of the folding transition is the inverse of the mean first-passage time (4) with these parameters, as follows:

$$K_-(f) = \frac{f}{\gamma_{\text{FAK}}\Delta u} \left( \frac{k_{\text{B}}T}{f\Delta u} [e^{f\Delta u/k_{\text{B}}T} - 1] - 1 \right)^{-1}, \quad (9)$$

with the shorthand notation  $\Delta u = (u_{\max} - u_0)$ . When the force is high, and the [o] state has a deep free-energy minimum generated by this external mechanical work (see Fig. 3 b), this rate reduces exponentially with pulling force:  $K_- \approx (f^2/\gamma_{\text{FAK}}k_{\text{B}}T)e^{-f\Delta u/k_{\text{B}}T}$ . This reflects the increasing stability of the [o] state when FAK is pulled with a high force, even before it phosphorylates and further stabilizes in the active state [a]. On the other hand, at vanishing force,  $f \rightarrow 0$ , this rate becomes  $K_- \approx 2k_{\text{B}}T/\gamma_{\text{FAK}}\Delta u^2$ , which is the free-diffusion time over the distance  $(u_{\max} - u_0)$ , or the natural time of refolding of the force-free open state.

We must mention several factors that would make the process of autoinhibition more complicated, and its rate  $K_-$  deviates from the simple expression (9). First of all, the [o] state will in most cases be quickly phosphorylated, which means there will be an additional binding energy  $\Delta G_a$  stabilizing this conformation—making the effective rate of autoinhibition lower than is predicted by Eq. 9. On the other hand, there is an effect of extension-elasticity of talin (40,41) that would provide an additional returning force acting on the FAK complex: this would make the low/zero force case fold back faster, at a higher rate  $K_-$ . Although these are interesting and important questions that need to be investigated, at the moment we will focus on the simplest approximation to understand the universal qualitative features of FAK sensor dynamics.

To be able to compare different expressions, and plot different versions of transition rates, we must identify the nondimensional scaling of  $K_-$ . Factoring the same natural timescale as we used for  $K_+$ , the expression takes the following form:

$$K_- = \left( \frac{\Delta G_o}{u_0^2 \gamma_{\text{FAK}}} \right) \frac{g \bar{f}^2}{(e^{g \bar{f} \lambda} - 1) - g \bar{f} \lambda}, \quad (10)$$

where, as before, the force is scaled as  $f = \bar{f}\Delta G_o/u_0$ , the opening energy barrier is  $g = \Delta G_o/k_{\text{B}}T$ , and the ratio of two length scales (in [c] and [o] states) is labeled by the parameter  $\lambda = (u_{\max} - u_0)/u_0$  (see Fig. 2). We do not have direct structural information about the physical extent of FAK opening. However, taking the structural data on the separate FAK domains from the work of Lietha et al. (22), Cai et al. (70), and Zhao and Guan (71), we make an estimate that  $u_{\max} \approx 6.5$  nm, essentially determined by the double of the size of folded kinase domain (see Fig. 2). This gives  $\lambda \approx 6$  and lets us plot the comparison of the two transition rates,  $\bar{K}_+$  and  $\bar{K}_-$ .

Fig. 10 gives the transition rates,  $K_+(f, \kappa)$  and  $\bar{K}_-(f)$ , plotted as a function of increasing pulling force. The rate of closing,  $\bar{K}_-$ , does not depend on the substrate parameters and is rapidly increasing when the [c] → [o] range of protein potential energy is flat (see Fig. 3). In this range of parameters, the product  $g\bar{f}\lambda$  in the Eq. 10 is large, and the expression decays exponentially as  $\exp[-g\bar{f}\lambda]$ . This implies that the transition from the strongly autoinhibited population of FAK sensors to the largely activated sensors is rather sharp. We find that the cross-over force at which  $K_+ \approx K_-$  is a relatively universal prediction, giving an estimate for the order-of-magnitude force required to keep the FAK conformation open as  $f^* \approx 10$  pN.

One might be tempted, in the traditional way, to interpret the ratio of the on- and off-rates  $K_+/K_-$  as an equilibrium concentration of closed and open/activated states. However, we must remember that this process of mechanosensing is inherently nonequilibrium, even though it might be steady state on the timescale of sensor response. Even in the regime of very low pulling forces, when  $K_- \gg K_+$ , the few FAK molecules that are spontaneously open would

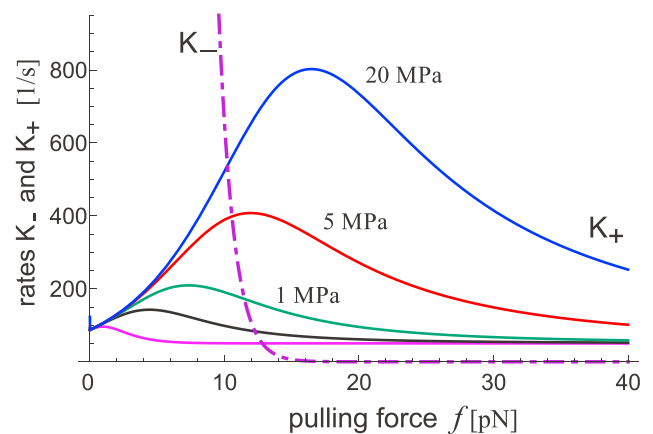

FIGURE 10 Given here is a comparison of the opening and closing rates,  $K_+$  and  $K_-$ , for several different substrate stiffnesses (the last two  $K_+$  curves are for 0.3 MPa and 30 kPa). When the cytoskeleton pulling force is too low, the rate of autoinhibition rapidly increases and one does not expect strong phosphorylation and positive feedback of mechanosensor. To see this figure in color, go online.

provide the required (low) level of signal to the cell pathways. It is simply an indication of sensor reversibility: Fig. 10 predicts that as soon as the force reduces below  $f^*$ , most of the FAK molecules would fold back and auto-inhibit their action.

## CONCLUSIONS

Figs. 6 and 7 each contain lots of information, but when we link the two we uncover the true nature of this reversible mechanosensor. If we place a cell on a substrate of given stiffness  $\kappa_f$  (or Young's modulus  $Y_f$ ), then, if the cytoskeletal tension is initially zero, the mechanosensors will generate a positive feedback loop: FAK activation leads, via the Erk or Rho GTPase pathways (25), to the increased production of actin and activation of myosin. Assembling more F-actin, and using more motors, the cell will increase tension in the cytoskeleton, which will further increase the rate of FAK activation on stiffer substrates. This positive feedback goes until approximately the peak position of the curves in Fig. 7 *a*, after which the further increase of tension shuts down the FAK activation response. The resulting negative feedback loop returns the cell to its homeostatic level of the cytoskeleton tension  $f(\kappa_f)$ , corresponding to the given substrate stiffness. If we look at the stiffness sensitivity of the FAK complex at this fixed level of force,  $f(\kappa_f)$ , we find the maximum sensitivity (identified with the peaks in Fig. 6 *b*) is very close to the actual substrate stiffness,  $\kappa_f$ . So, this physical model describes a naturally adaptive sensor: not only does cytoskeletal tension adjust according to the substrate stiffness, but this remodeling adapts the sensor response so that it remains sensitive to its immediate surroundings—small changes in the substrate stiffness will give large changes in the activation rate of FAK activation once the positive and negative feedback rebalance in homeostasis.

This is desirable behavior in a biological sensor, and it is remarkable that it is produced in our simple model with no prior stipulation. We initially only required that the cell be responsive to changes in the stiffness—how big these changes were, or if they were optimal, was not close to the front of our minds. For such a simple model to predict useful adaptive sensing behavior is exciting to us.

Importantly, on soft substrates (gels or soft tissues), the FAK signaling feedback is always negative and FAK auto-inhibition on its own would lead to a very low cytoskeletal tension—no focal adhesions or stress fibers are formed on such substrates. It is likely that other mechanosensors become more relevant on very soft substrates (and in planktonic suspension), such as the TGF- $\beta$  latent complex (13): after all, the very name of FAK suggests its relation to focal adhesions, which only occur in stiffer environments. This idea corresponds very well with experimental work showing that cells on sufficiently soft substrates do not form stable focal adhesions (72).

Focal adhesions are extremely complex assemblies, and it would be naive of us to suggest that FAK is the only way the cell responds to its mechanical environment. In reality, we feel it is likely that several options for mechanosensing exist at focal adhesions, and not one of them tells the whole story. We feel that there is a role for FAK to play in this story, but perhaps the clustering of integrins is a significant factor—at least on stiff substrates.

Why did we choose to focus on FAK? We could instead (or simultaneously) examine any of the other big molecules with autocatalytic activity involved in the force chain in Fig. 2. The obvious alternative would be talin, which has the confirmed connection between integrin and actin (30) and the large conformational change under applied force (41). However, as already stated, the literature acknowledges the crucial role of focal adhesion kinase in mechanosensing at focal adhesions (4,20), but does not yet understand how this role takes place. With the context of the simulation study (42), we felt it would be most stimulating to frame our discussion in terms of FAK. It may be that maybe talin and FAK both play the same role—in this case, it feels natural that any modification to the model happens at a higher level, when the kinetic equations of all the mechanosensing processes are written down and analyzed.

We did not attempt to capture any collective effects in this model, and acknowledge that there is significant ground to be gained in expanding our model to one describing the allosteric coupling. As an example of an extension to collective effects within our model, we note that phosphorylated FAK acts on several important signaling molecules, such as Rho and Rac. If these molecules act to increase the tension in actin filaments in the broad vicinity, rather than strictly for filaments attached to active FAK molecules, then there will be a cooperative effect—once a single focal adhesion kinase autophosphorylates, the tension in surrounding filaments will increase, and this increases the probability of a second opening event, and so on.

The dependence of the FAK opening rate on viscoelastic stress relaxation partly explains results obtained in experimental work on cell spreading with different viscoelastic substrates (69). Chaudhuri et al. (69) saw suppression of cell spreading (associated with lower FAK activation) on substrates with significant stress relaxation, compared with purely elastic substrates of nominally the same storage modulus. We should note that we fail to capture the behavior Chaudhuri et al. (69) observed at very low stiffness (1.4 kPa). On such a soft substrate, they saw that the number of cells with stress fibers was actually enhanced on substrates with stress relaxation—the opposite trend to stiffer substrates. This is not surprising; our model deals with mature focal adhesion complexes that would not develop on substrates of  $\sim$ kPa stiffness.

In summary, this work develops a theoretical model of the physical mechanism that a reversible mechanosensor of the second kind should use. We focus all our discussion on

the focal adhesion kinase, in association with integrin and talin, connecting the force-providing cytoskeletal F-actin and the varying-stiffness ECM. However, the fundamental principles of the model apply to many multidomain protein complexes. The next steps are to link the main result of this work (the rate of opening  $K_+$ ) with the nonlinear dynamics of one or several signaling pathways that produce the morphological response of the cell to the signal the mechanosensor generates.

## SUPPORTING MATERIAL

Supporting Materials and Methods and four figures are available at [http://www.biophysj.org/biophysj/supplemental/S0006-3495\(17\)30498-8](http://www.biophysj.org/biophysj/supplemental/S0006-3495(17)30498-8).

## AUTHOR CONTRIBUTIONS

All authors contributed to carrying out research and writing the article.

## ACKNOWLEDGMENTS

We have benefited from many useful discussions and the support of G. Fraser, K. Chalut, T. Alliston, H. Welch, X. Hu, and D. C. W. Foo.

This work has been funded by Engineering and Physical Sciences Research Council (EPSRC) grant No. EP/M508007/1.

## REFERENCES

- Provenzano, P. P., D. R. Inman, ..., P. J. Keely. 2009. Matrix density-induced mechanoregulation of breast cell phenotype, signaling and gene expression through a FAK-ERK linkage. *Oncogene*. 28:4326–4343.
- Barcus, C. E., P. J. Keely, ..., L. A. Schuler. 2013. Stiff collagen matrices increase tumorigenic prolactin signaling in breast cancer cells. *J. Biol. Chem.* 288:12722–12732.
- Bershadsky, A., M. Kozlov, and B. Geiger. 2006. Adhesion-mediated mechanosensitivity: a time to experiment, and a time to theorize. *Curr. Opin. Cell Biol.* 18:472–481.
- Geiger, B., J. P. Spatz, and A. D. Bershadsky. 2009. Environmental sensing through focal adhesions. *Nat. Rev. Mol. Cell Biol.* 10:21–33.
- Opsahl, L. R., and W. W. Webb. 1994. Transduction of membrane tension by the ion channel alamethicin. *Biophys. J.* 66:71–74.
- Sachs, F. 2010. Stretch-activated ion channels: what are they? *Physiology (Bethesda)*. 25:50–56.
- Haswell, E. S., R. Phillips, and D. C. Rees. 2011. Mechanosensitive channels: what can they do and how do they do it? *Structure*. 19:1356–1369.
- Evans, E., and K. Ritchie. 1997. Dynamic strength of molecular adhesion bonds. *Biophys. J.* 72:1541–1555.
- Bruinsma, R. 2005. Theory of force regulation by nascent adhesion sites. *Biophys. J.* 89:87–94.
- Bell, G. I. 1978. Models for the specific adhesion of cells to cells. *Science*. 200:618–627.
- Kramers, H. A. 1940. Brownian motion in the field of force and the diffusion model of chemical reactions. *Physica*. 7:284–304.
- Hanggi, P. 1986. Brownian motion in the field of force. *J. Stat. Phys.* 42:105–148.
- Escudé, M., M. K. Rigozzi, and E. M. Terentjev. 2014. How cells feel: stochastic model for a molecular mechanosensor. *Biophys. J.* 106:124–133.
- Erdmann, T., and U. S. Schwarz. 2004. Stochastic dynamics of adhesion clusters under shared constant force and with rebinding. *J. Chem. Phys.* 121:8997–9017.
- Schwarz, U. S., T. Erdmann, and I. B. Bischofs. 2006. Focal adhesions as mechanosensors: the two-spring model. *Biosystems*. 83:225–232.
- Khalil, N. 1999. TGF- $\beta$ : from latent to active. *Microbes Infect.* 1:1255–1263.
- Tomasek, J. J., G. Gabbiani, ..., R. A. Brown. 2002. Myofibroblasts and mechanoregulation of connective tissue remodelling. *Nat. Rev. Mol. Cell Biol.* 4:349–363.
- Shi, M., J. Zhu, ..., T. A. Springer. 2011. Latent TGF- $\beta$  structure and activation. *Nature*. 474:343–349.
- Burridge, K., K. Fath, ..., C. Turner. 1988. Focal adhesions: transmembrane junctions between the extracellular matrix and the cytoskeleton. *Annu. Rev. Cell Biol.* 4:487–525.
- Schaller, M. D., C. A. Borgman, ..., J. T. Parsons. 1992. pp125FAK a structurally distinctive protein-tyrosine kinase associated with focal adhesions. *Proc. Natl. Acad. Sci. USA*. 89:5192–5196.
- Tilghman, R. W., J. K. Slack-Davis, ..., J. T. Parsons. 2005. Focal adhesion kinase is required for the spatial organization of the leading edge in migrating cells. *J. Cell Sci.* 118:2613–2623.
- Lietha, D., X. Cai, ..., M. J. Eck. 2007. Structural basis for the autoinhibition of focal adhesion kinase. *Cell*. 129:1177–1187.
- Mitra, S. K., D. A. Hanson, and D. D. Schlaepfer. 2005. Focal adhesion kinase: in command and control of cell motility. *Nat. Rev. Mol. Cell Biol.* 6:56–68.
- Yang, B., Z. Z. Lieu, ..., M. P. Sheetz. 2016. Mechanosensing controlled directly by tyrosine kinases. *Nano Lett.* 16:5951–5961.
- Provenzano, P. P., and P. J. Keely. 2011. Mechanical signaling through the cytoskeleton regulates cell proliferation by coordinated focal adhesion and Rho GTPase signaling. *J. Cell Sci.* 124:1195–1205.
- Tilghman, R. W., and J. T. Parsons. 2008. Focal adhesion kinase as a regulator of cell tension in the progression of cancer. *Semin. Cancer Biol.* 18:45–52.
- Brancaccio, M., E. Hirsch, ..., G. Tarone. 2006. Integrin signalling: the tug-of-war in heart hypertrophy. *Cardiovasc. Res.* 70:422–433.
- Giannone, G., and M. P. Sheetz. 2006. Substrate rigidity and force define form through tyrosine phosphatase and kinase pathways. *Trends Cell Biol.* 16:213–223.
- Frame, M. C., H. Patel, ..., M. J. Eck. 2010. The FERM domain: organizing the structure and function of FAK. *Nat. Rev. Mol. Cell Biol.* 11:802–814.
- Hytönen, V. P., and B. Wehrle-Haller. 2016. Mechanosensing in cell-matrix adhesions—converting tension into chemical signals. *Exp. Cell Res.* 343:35–41.
- Zaidel-Bar, R., C. Ballestrem, ..., B. Geiger. 2003. Early molecular events in the assembly of matrix adhesions at the leading edge of migrating cells. *J. Cell Sci.* 116:4605–4613.
- Parsons, J. T. 2003. Focal adhesion kinase: the first ten years. *J. Cell Sci.* 116:1409–1416.
- Hynes, R. O. 1992. Integrins: versatility, modulation, and signaling in cell adhesion. *Cell*. 69:11–25.
- Hynes, R. O. 2002. Integrins: bidirectional, allosteric signaling machines. *Cell*. 110:673–687.
- Novikova, E. A., and C. Storm. 2013. Contractile fibers and catch-bond clusters: a biological force sensor? *Biophys. J.* 105:1336–1345.
- Kong, F., A. J. García, ..., C. Zhu. 2009. Demonstration of catch bonds between an integrin and its ligand. *J. Cell Biol.* 185:1275–1284.
- Giancotti, F. G. 2000. Complexity and specificity of integrin signalling. *Nat. Cell Biol.* 2:E13–E14.

38. Guan, J.-L., J. E. Trevithick, and R. O. Hynes. 1991. Fibronectin/integrin interaction induces tyrosine phosphorylation of a 120-kDa protein. *Cell Regul.* 2:951–964.
39. Guan, J.-L., and D. Shalloway. 1992. Fibronectin/integrin interaction induces tyrosine phosphorylation of a 120-kDa protein. *Nature.* 358:690–692.
40. Margadant, F., L. L. Chew, ..., M. Sheetz. 2011. Mechanotransduction in vivo by repeated talin stretch-relaxation events depends upon vinculin. *PLoS Biol.* 9:e1001223.
41. Yao, M., B. T. Goult, ..., J. Yan. 2016. The mechanical response of talin. *Nat. Commun.* 7:11966.
42. Zhou, J., C. Aponte-Santamaría, ..., F. Gräter. 2015. Mechanism of focal adhesion kinase mechanosensing. *PLOS Comput. Biol.* 11:e1004593.
43. Duke, T. A. J., and D. Bray. 1999. Heightened sensitivity of a lattice of membrane receptors. *Proc. Natl. Acad. Sci. USA.* 96:10104–10108.
44. Duke, T. A. J., N. Le Novère, and D. Bray. 2001. Conformational spread in a ring of proteins: a stochastic approach to allostery. *J. Mol. Biol.* 308:541–553.
45. Dunty, J. M., V. Gabarra-Niecko, ..., M. D. Schaller. 2004. FERM domain interaction promotes FAK signaling. *Mol. Cell. Biol.* 24:5353–5368.
46. Schlaepfer, D. D., M. A. Broome, and T. Hunter. 1997. Fibronectin-stimulated signaling from a focal adhesion kinase-c-Src complex: involvement of the Grb2, p130Cas, and Nck adaptor proteins. *Mol. Cell. Biol.* 17:1702–1713.
47. Sawada, Y., M. Tamada, ..., M. P. Sheetz. 2006. Force sensing by mechanical extension of the Src family kinase substrate p130Cas. *Cell.* 127:1015–1026.
48. van Nimwegen, M. J., and B. van de Water. 2007. Focal adhesion kinase: a potential target in cancer therapy. *Biochem. Pharmacol.* 73:597–609.
49. Kalgin, I. V., A. Caffisch, ..., M. Karplus. 2013. New insights into the folding of a  $\beta$ -sheet miniprotein in a reduced space of collective hydrogen bond variables: application to a hydrodynamic analysis of the folding flow. *J. Phys. Chem. B.* 117:6092–6105.
50. Brinkman, H. C. 1956. Brownian motion in a field of force and the diffusion theory of chemical reactions. II. *Physica.* 22:149–155.
51. Dudko, O. K., G. Hummer, and A. Szabo. 2006. Intrinsic rates and activation free energies from single-molecule pulling experiments. *Phys. Rev. Lett.* 96:108101.
52. Langer, J. S. 1969. Statistical theory of the decay of metastable states. *Ann. Phys.* 54:258–275.
53. Suzuki, Y., and O. K. Dudko. 2010. Single-molecule rupture dynamics on multidimensional landscapes. *Phys. Rev. Lett.* 104:048101.
54. Gardiner, C. W. 1985. *Handbook of Stochastic Methods*, 2nd Ed. Springer, Berlin, Germany.
55. Bhaskara, R. M., and N. Srinivasan. 2011. Stability of domain structures in multi-domain proteins. *Sci. Rep.* 1:40.
56. Brenner, M. D., R. Zhou, and T. Ha. 2011. Forcing a connection: impacts of single-molecule force spectroscopy on in vivo tension sensing. *Biopolymers.* 95:332–344.
57. Lecuit, T., P. F. Lenne, and E. Munro. 2011. Force generation, transmission, and integration during cell and tissue morphogenesis. *Annu. Rev. Cell Dev. Biol.* 27:157–184.
58. Finer, J. T., R. M. Simmons, and J. A. Spudich. 1994. Single myosin molecule mechanics: piconewton forces and nanometre steps. *Nature.* 368:113–119.
59. Bershadsky, A. D., N. Q. Balaban, and B. Geiger. 2003. Adhesion-dependent cell mechanosensitivity. *Annu. Rev. Cell Dev. Biol.* 19:677–695.
60. Pollock, C. M., and R. E. Shadwick. 1994. Relationship between body mass and biomechanical properties of limb tendons in adult mammals. *Am. J. Physiol.* 266:R1016–R1021.
61. Gosline, J., M. Lillie, ..., K. Savage. 2002. Elastic proteins: biological roles and mechanical properties. *Philos. Trans. R. Soc. Lond. B Biol. Sci.* 357:121–132.
62. Bellingham, C. M., M. A. Lillie, ..., F. W. Keeley. 2003. Recombinant human elastin polypeptides self-assemble into biomaterials with elastin-like properties. *Biopolymers.* 70:445–455.
63. Mithieux, S. M., J. E. J. Rasko, and A. S. Weiss. 2004. Synthetic elastin hydrogels derived from massive elastic assemblies of self-organized human protein monomers. *Biomaterials.* 25:4921–4927.
64. Kolahi, K. S., A. Donjacour, ..., P. Rinaudo. 2012. Effect of substrate stiffness on early mouse embryo development. *PLoS One.* 7:e41717.
65. Handorf, A. M., Y. Zhou, ..., W.-J. Li. Tissue stiffness dictates development, homeostasis, and disease progression. *Organogenesis.* 11:1–15.
66. Landau, L. D., and I. M. Lifshitz. 1986. *Theory of Elasticity*, 3rd Ed. Butterworth-Heinemann, Oxford, UK.
67. Yeung, T., P. C. Georges, ..., P. A. Janmey. 2005. Effects of substrate stiffness on cell morphology, cytoskeletal structure, and adhesion. *Cell Motil. Cytoskeleton.* 60:24–34.
68. Mayor, U., C. M. Johnson, ..., A. R. Fersht. 2000. Protein folding and unfolding in microseconds to nanoseconds by experiment and simulation. *Proc. Natl. Acad. Sci. USA.* 97:13518–13522.
69. Chaudhuri, O., L. Gu, ..., D. J. Mooney. 2015. Substrate stress relaxation regulates cell spreading. *Nat. Commun.* 6:6364.
70. Cai, X., D. Lietha, ..., M. D. Schaller. 2008. Spatial and temporal regulation of focal adhesion kinase activity in living cells. *Mol. Cell. Biol.* 28:201–214.
71. Zhao, J., and J.-L. Guan. 2009. Signal transduction by focal adhesion kinase in cancer. *Cancer Metastasis Rev.* 28:35–49.
72. Trappmann, B., J. E. Gautrot, ..., W. T. S. Huck. 2012. Extracellular-matrix tethering regulates stem-cell fate. *Nat. Mater.* 11:642–649.

**Biophysical Journal, Volume 112**

**Supplemental Information**

**Focal Adhesion Kinase: The Reversible Molecular Mechanosensor**

**Samuel Bell and Eugene M. Terentjev**

# Focal adhesion kinase – the reversible molecular mechanosensor: Supplementary Information

Samuel Bell and Eugene M. Terentjev<sup>1</sup>

*Cavendish Laboratory, University of Cambridge, Cambridge, CB3 0HE, U.K.*

## THE ROLE OF DOMAIN BONDING STRENGTH

We have commented in the main text that there is no accurate knowledge on the strength of interdomain bond for FERM-kinase linkage (which is known to contain a hydrophobic cluster composed of residues Y180, M183, N193, V196, and F596, an additional salt bridge D200-R598, and an electrostatic bond at E182, R184, K190 and N595, N628, N629, E636). The literature give the upper bound of this energy:  $\Delta G_o \approx 28.5k_B T$ , and a lower bound:  $\Delta G_o \approx 11k_B T$ , which has led us to take a median value of  $17k_B T$  in the main text. Here we shall present the alternative results for the two bound values of  $\Delta G_o$  for comparison and discussion. Let us emphasize – we do not believe either bound is realistic, and consider the results presented in the main text valid.

The illustrations given in Figs. 1, 2, 3 show how sensitive the biologically meaningful response is to the value of interdomain bonding strength. In either case of strong bond, or weak bond, the rate of FAK opening (given by the universal model described in the main text) changes with the applied pulling force – or the changing substrate stiffness for a given force – in an entirely unreasonable way. For the strong bond, the overall magnitude of the  $K_+$  rate is very low, making a single FAK molecule activating in several seconds – this, before even considering the re-folding rate  $K_-$  that would certainly prevent any activation dynamics. For the weak interdomain bond, we find (perhaps counterintuitively, until one considers the real physical reason for the  $[c] \rightarrow [o]$  transition) that only very stiff substrates (bone, plastics and above) would give any sensitivity to the FAK complex – in the range where we know the cells respond most to the stiffness changes, this model predicts no response at all: just a uniform random opening of the weakly-bonded domains. As a result, we have concluded that the discussion presented in the main text represents the most biologically meaningful scenario.

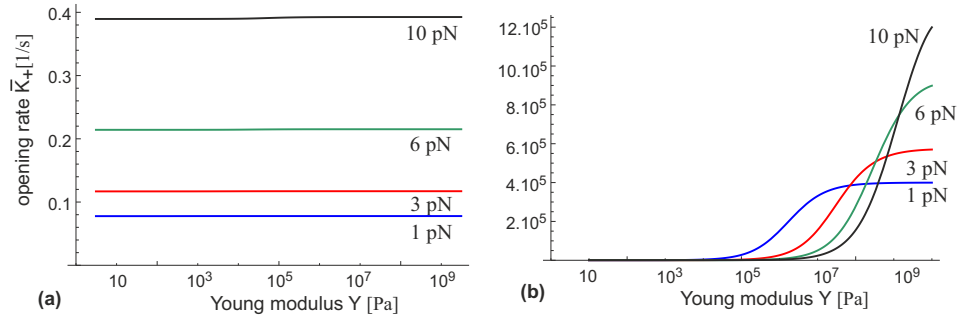

FIG. 1. The rate constant of the  $[c] \rightarrow [o]$  transition  $K_+(f, \kappa)$  plotted against the substrate stiffness (on logarithmic scale), for several values of the pulling force  $f$  corresponding to the plots in the main text. Plot (a) is for  $\Delta G_o = 28.5k_B T$ ; plot (b) is for  $\Delta G_o = 11k_B T$ . Note the very low overall rates of opening, and a complete lack of mechanosensitivity for the strong interdomain bonding (a), and a regime of sensitivity shifted to unreasonably high stiffness for the low bonding energy in (b).

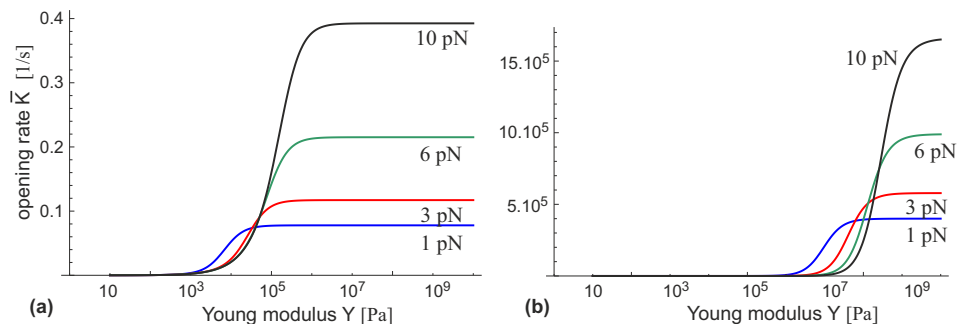

FIG. 2. The same ‘sensor’ plots as in Fig. 1, for  $\Delta G_0 = 28.5k_B T$  (a), and for  $\Delta G_0 = 11k_B T$  (b). This time we took a constant value of the substrate damping coefficient  $\gamma_{\text{sub}} = 0.01$  kg/s, so that the ratio  $\zeta = \gamma_c/\gamma_{\text{sub}} \approx 10^{-7}$  is fixed. Although the sensitivity is recovered, overall rates of opening are still extremely low for the strong interdomain bonding, while there is very little change of only high-stiffness sensitivity for the low bonding energy.

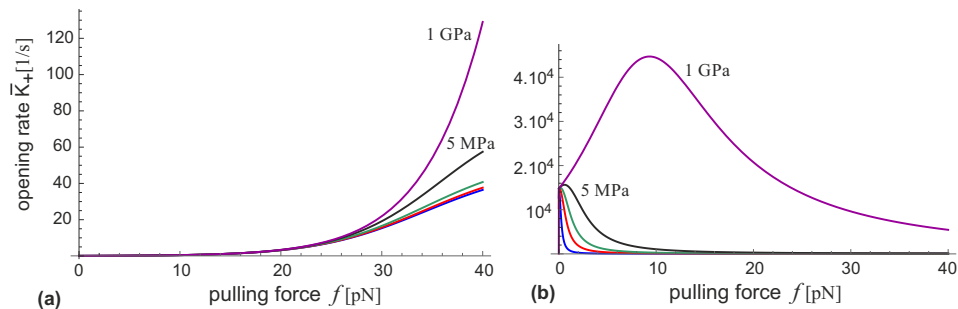

FIG. 3. The rate constant of FAK opening  $K_+(f, \kappa)$  is plotted as a function of the pulling force  $f$ , for several values of substrate stiffness labelled on the plot. Again we compare the strong interdomain bond with  $\Delta G_0 = 28.5k_B T$  (a) with the weak bond for  $\Delta G_0 = 11k_B T$  (b). In the first case, we see that there is very little sensitivity, and very high forces required to achieve any FAK activation. In the weakly-bonded case, the ‘sensor’ responds with a negative feedback (effectively shutting itself down) for all substrates except the most stiff glass.

## VISCOELASTICITY AND STRESS RELAXATION

Viscoelasticity is a broad and well-studied subject. However, because of the large literature available, sometimes different ideas get confused; in particular this is the case with the subject of stress relaxation. There are two very different effects: the long-time macroscopic relaxation of stress after e.g. a step-deformation was imposed at  $t = 0$ , and the internal relaxation of local fluctuations that is a much shorter-time process. The first effect is very easy to measure with simple equipment, and many rubbery and gel materials have a very long relaxation time: of hours if not days. This is a result of complex many-body correlation of individual relaxation processes, describing internal re-arrangement of chains and whole clusters. However, this is not what controls the damping of local fluctuations that determines the parameter  $\gamma_{\text{sub}}$  we need to estimate. This local damping is determined by an internal relaxation time (which we called  $\tau_{\text{sub}} = \gamma_{\text{sub}}/\kappa$ ) and it manifests itself in a characteristic peak of the loss modulus (and the associated steepest-gradient point of the storage modulus). In simple viscoelastic models (such as Maxwell, Voigt, or Zener models) this internal relaxation is the only process, which directly enters into the model expressions for the frequency-dependent real and imaginary parts of the complex viscoelastic modulus  $Y^*$  (which is a function of non-dimensional product  $\omega\tau_{\text{sub}}$ ). Note that we are dealing with the Young modulus here, to make a better link with the arguments in the main text, while most of the literature on viscoelastic rheology presents the shear modulus  $G^*(\omega)$  instead.

Our problem is that we wish to compare very different substrate materials, across a vast range of their equilibrium stiffness. Figure 4 shows the characteristic rheological traces for several typical materials (some data is taken from the literature, some measured by ourselves). In all cases, the regime  $\omega \rightarrow 0$  gives the equilibrium Young modulus of the material, as labelled in the plots. The softest of all materials we could have access to was a colloidal gel, with  $Y_0 = 40$  Pa (such a low modulus would not be able to support a droplet bigger than 1mm against gravity). We also used a very weakly crosslinked silicone elastomer with a low  $Y_0 = 2$  kPa (which is a typical stiffness of a glial tissue; a typical muscle would have  $Y_0 \geq 10$  kPa). Then we see a viscoelastic response of a typical rubber with the equilibrium

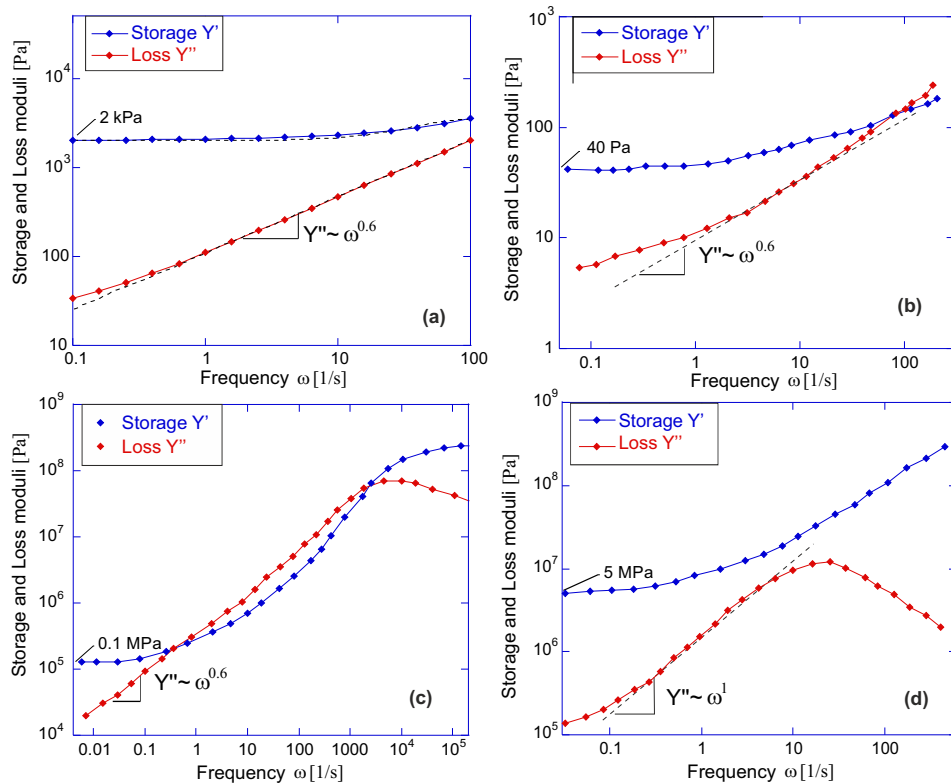

FIG. 4. Storage and loss moduli of viscoelastic materials: (a) a soft elastomer from weakly crosslinked Sylgard 527, (b) a very soft colloidal gel [ref: colloidal gel], (c) a typical rubber [A. M. Squires, A. R. Tajbakhsh, and E. M. Terentjev: *Dynamic Shear Modulus of Isotropic Elastomers*, Macromolecules **37**, 1652, 2004], and (d) PMMA plastic – all measured at room temperature. The plots illustrate the characteristic low-frequency regime: the equilibrium modulus  $Y_0$ , and the frequency-scaling of the loss modulus  $Y''$  (labelled in each plot). The peak of  $Y''$  marks the characteristic relaxation time we named  $\tau_{\text{sub}}$ ; in plots (a) and (b) the peak is not in the experiment range, so we had to fit the data to a viscoelastic model depending on  $\omega\tau_{\text{sub}}$ .

stiffness  $Y_0 = 100$  kPa (a bit higher than pre-calcified bone), and a PMMA plastic with  $Y_0 = 5$  MPa. We do not give a measurement for the mineral glass, where  $Y_0 > 1$  GPa is normally found.

The analysis in Fig. 4 gives a remarkably consistent value of the internal relaxation time, in spite of the vast difference in types of materials. In the two systems we did not have the peak of the loss factor explicitly within experimental range, the fitting of the basic model was used: the loss modulus  $Y'' = Y' \cdot (\omega\tau_{\text{sub}})^x$  at low frequency, using the independently determined scaling exponent  $x$  in each plot (which, in turn, has shown a remarkable consistency). In the two plots where the peak of loss modulus is evident, we simply take  $\tau_{\text{sub}} = 1/\omega_{\text{peak}}$ . The result is that in plots (a) and (b) we had  $\tau_{\text{sub}} = 0.007$  s, and  $0.011$  s, respectively. In stiffer materials we had  $\tau_{\text{sub}} \approx 0.001$  s in rubber, and  $0.05$  s in PMMA plastic. Combined with the literature data on the  $\beta$ -relaxation time in glass being also  $\sim 0.01$  s (see main text), we follow a bold assumption, taking the substrate relaxation time  $\tau_{\text{sub}} \approx 0.01$  s always, and then calculating the damping constant  $\gamma_{\text{sub}} = \tau_{\text{sub}}\kappa$  in all our analysis. It is certainly not perfect, but hopefully the arguments above explain that the values thus obtained are never far from accurate.
